# Supplementary material for: Reference genes selection for transcript normalization in kenaf (Hibiscus cannabinus L.) under salinity and drought stress
Source: PeerJ. 2015 Nov 26;3:e1347. doi: 10.7717/peerj.1347 (PMC4671189; doi:10.7717/peerj.1347)
Supplement: Figure S1 [file peerj-03-1347-s003.xls]

## Sheet: Sheet1
18S rRNA	EF1	PP2A	ACT4	PTB	MZA	TUB	RAN	UBQ	UBC
16.8608	22.5753	28.1783	22.7886	28.7302	34.0462	30.0837	32.7642	34.0941	25.0969
16.4562	22.1975	27.9244	22.1827	27.8182	31.9514	29.5287	30.2534	31.2028	23.3189
17.645	23.4286	28.9944	23.8967	28.9182	34.63	30.5349	32.2477	33.3162	24.8362
17.8168	22.8341	29.0179	23.02	28.8498	34.4186	31.0597	32.3206	32.7612	24.2522
15.897	19.7507	26.428	19.9794	25.9367	34.2358	30.911	31.5579	31.5882	21.8602
16.3643	19.9369	26.8843	20.2067	26.2238	34.9777	30.9308	32.4684	29.1083	22.1808
15.6121	20.2686	26.5366	20.295	25.945	34.937	31.0348	32.445	32.8426	21.7348
19.9996	25.3047	28.1783	22.7886	28.7302	34.0462	30.0837	32.7642	34.0941	25.0969
18.0208	22.6193	28.9037	21.6888	29.2969	34.1609	29.5575	29.951	28.6661	23.6539
19.8496	23.9686	29.8071	23.2719	29.6464	34.7673	30.5373	34.2972	30.0192	25.0994
18.104	22.6995	28.1242	21.8082	27.4347	34.1113	29.2157	31.5209	29.5649	23.4353
19.2206	22.8772	29.7433	23.3873	28.7476	34.4955	29.6329	32.9249	29.5462	24.3801
18.2225	22.8287	28.7915	22.3778	27.7943	34.7246	29.5527	31.648	29.3826	23.716
20.3741	23.1472	29.8777	22.6615	29.8223	34.4607	30.6591	33.4196	29.8787	23.4032
