# Supplementary material for: Reference genes selection for transcript normalization in kenaf (Hibiscus cannabinus L.) under salinity and drought stress
Source: PeerJ. 2015 Nov 26;3:e1347. doi: 10.7717/peerj.1347 (PMC4671189; doi:10.7717/peerj.1347)
Supplement: Figure S2 [file peerj-03-1347-s004.xls]

## Sheet: Sheet1
Fig.2A-NaCl
UBC	EF1α	PTB	MZA	PP2A	ACT4	UBQ	RAN	18S rRNA	TUBα
1.6764	1.41443	1.18845	1.10148	0.941203	0.873488	0.696293	0.673514	0.659799	0.659799
Fig.2B-PEG
UBC	EF1α	PTB	RAN	PP2A	UBQ	MZA	ACT4	18S rRNA	TUBα
1.12941	0.995377	0.800621	0.71483	0.620013	0.509593	0.421214	0.375949	0.281679	0.281679
Fig.2C-NaCl+PEG
UBC	EF1α	PTB	MZA	PP2A	ACT4	RAN	UBQ	18S rRNA	TUBα
1.60608	1.40737	1.05529	0.972361	0.890077	0.820504	0.739398	0.613665	0.510869	0.510869
Fig.2D-PV
	V2/3	V3/4	V4/5	V5/6	V6/7	V7/8	V8/9	V9/10
NaCl	0.198462	0.152449	0.216742	0.16773	0.160295	0.178966	0.254305	0.274469
PEG	0.133017	0.105144	0.123707	0.140213	0.133819	0.127768	0.189555	0.156834
NaCl+PEG	0.147634	0.154192	0.167984	0.197374	0.204842	0.148747	0.232584	0.228409
