# Supplementary material for: Reference genes selection for transcript normalization in kenaf (Hibiscus cannabinus L.) under salinity and drought stress
Source: PubMed Central journal article supplement (PMC4671189; doi:10.7717/peerj.1347), 2015-11-26
Supplement: peerj-03-1347-s001.pdf [file peerj-03-1347-s001.pdf]

S1: PCR products of 10 reference genes checked on a 2.0% agarose gel.

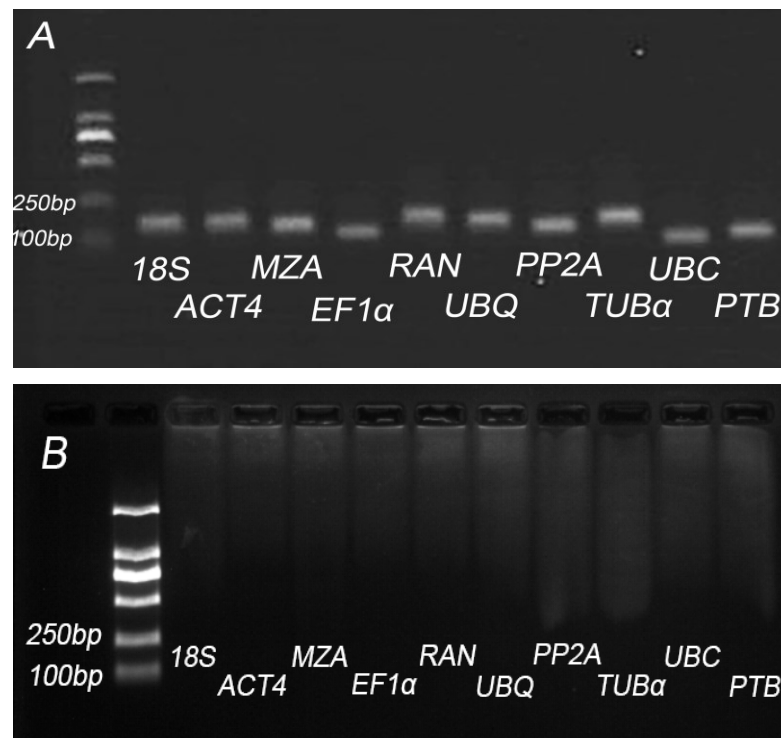

A: DNase digested RNA subjected to a cDNA synthesis with Reverse Transcriptase.

B: A negative RT reaction whereby DNase digested RNA is subjected to a mock cDNA synthesis without Reverse Transcriptase.
