# Supplementary material for: Reference genes selection for transcript normalization in kenaf ( Hibiscus cannabinus L.) under salinity and drought stress
Source: PeerJ journal article supplement (doi:10.7717/peerj.1347), 2015-11-26

S2: Melting curves of the 10 candidate reference genes tested in this study.

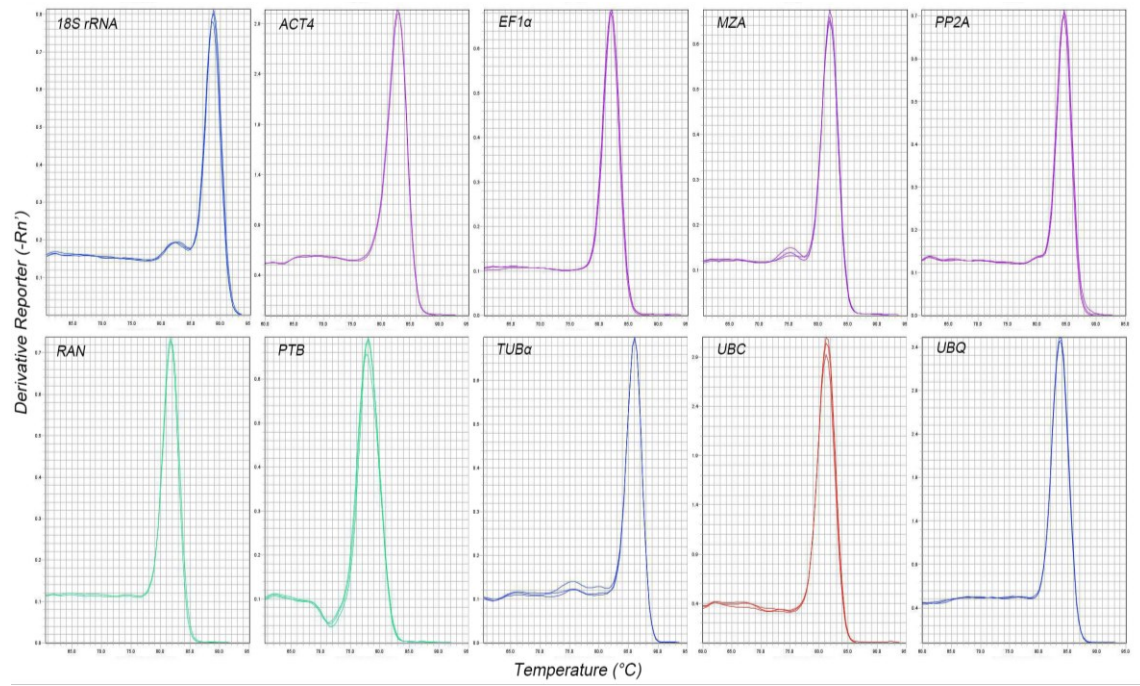

Supplement: supplementary_S2.pdf [file supplementary_S2.pdf]
