# Supplementary material for: Reference genes selection for transcript normalization in kenaf (Hibiscus cannabinus L.) under salinity and drought stress
Source: PeerJ. 2015 Nov 26;3:e1347. doi: 10.7717/peerj.1347 (PMC4671189; doi:10.7717/peerj.1347)
Supplement: Table S4 [file peerj-03-1347-s008.xls]

## Sheet: Sheet1
geNorm-NaCl+PEG
UBC	EF1α	PTB	MZA	PP2A	ACT4	RAN	UBQ	18S rRNA	TUBα
1.60608	1.40737	1.05529	0.972361	0.890077	0.820504	0.739398	0.613665	0.510869	0.510869
NormFinder-NaCl+PEG
ACT4	18S rRNA	UBQ	PP2A	PTB	TUBα	RAN	MZA	EF1α	UBC
0.195098	0.344757	0.413977	0.416514	0.575915	0.636475	0.761548	0.902677	1.3032	1.61694
BestKeeper-NaCl+PEG
MZA	TUBa	RAN	PP2A	UBC	PTB	ACT4	EF1a	UBQ	18S rRNA
1.31±0.45	1.89±0.57	2.66±0.86	3.24±0.92	3.88±0.92	3.89±1.09	4.42±0.98	4.89±1.10	5.44±1.70	6.84±1.22
